# Supplementary material for: Lactate dehydrogenase A negatively regulated by miRNAs promotes aerobic glycolysis and is increased in colorectal cancer
Source: PubMed Central journal article supplement (PMC4637298; doi:10.18632/oncotarget.3318), 2015-04-10
Supplement: oncotarget-06-19456-s001.pdf [file oncotarget-06-19456-s001.pdf]

SUPPLEMENTARY FIGURES AND TABLES

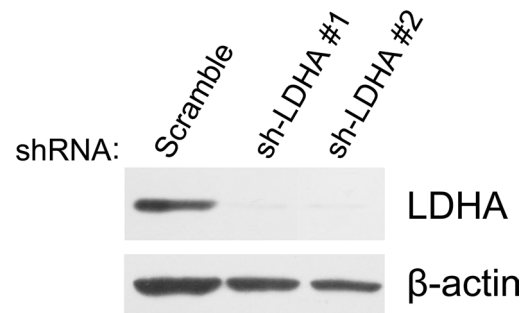

Supplementary Figure 1: Western blot analysis of LDHA in cells stably expressing LDHA-shRNA or scramble-shRNA.

A

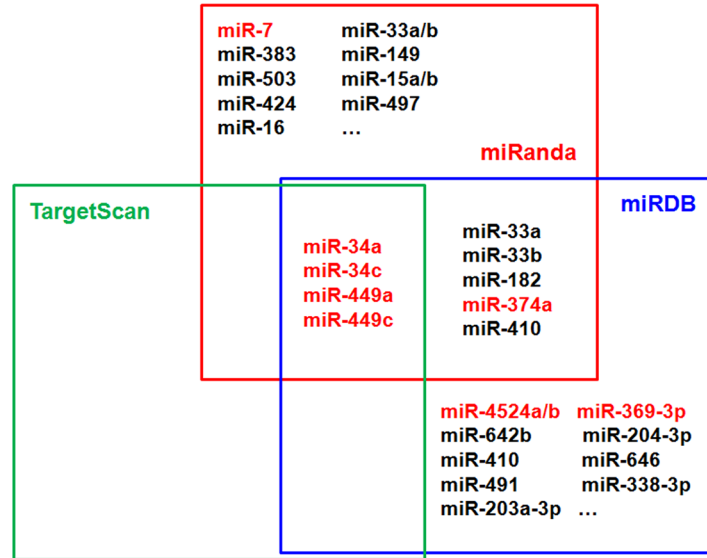

B

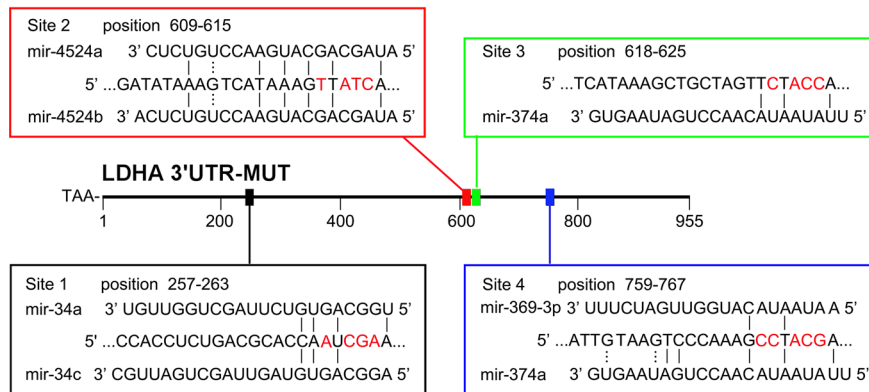

C

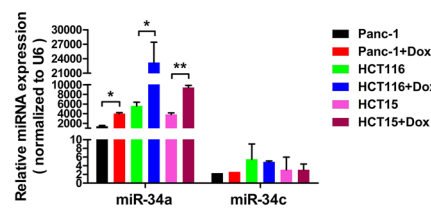

D

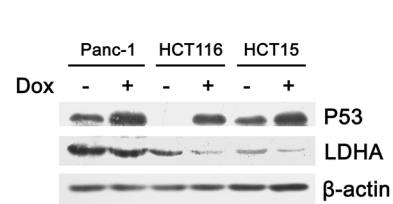

**Supplementary Figure 2:** (A) miRNAs, predicted by miRanda, TargetScan and miRDB, target LDHA. miRNAs that were predicted by two or more algorithms are indicated. (B) Sequences of indicated miRNAs and nucleotides mutated in LDHA-3' UTR-MUT. (C) RT-PCR analysis of miR-34a and miR-34c in Panc 1, HCT116, and HCT15 cells treated with doxorubicin. (D) Western blot analysis of P53 and LDHA in Panc 1, HCT116, and HCT15 cells treated with doxorubicin.

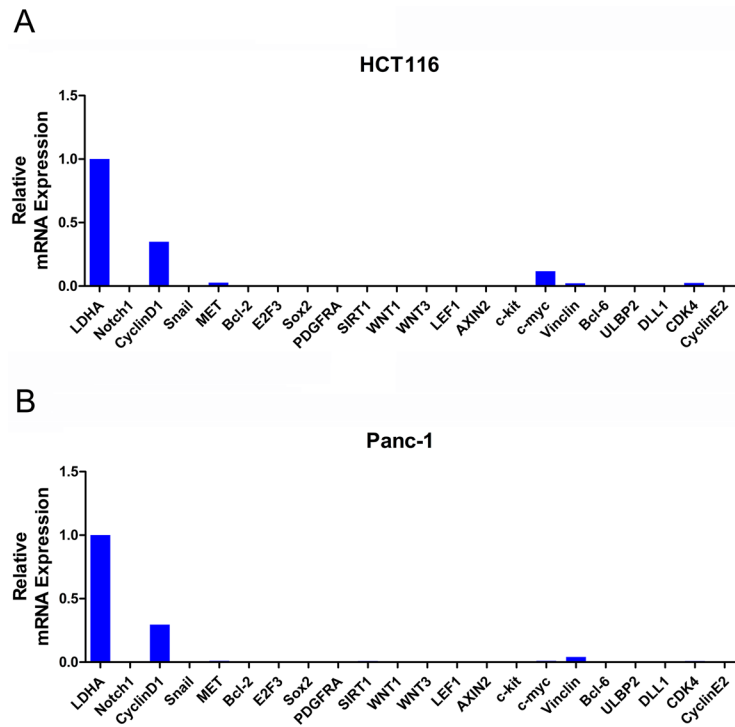

Supplementary Figure 3: (A, B) RT-PCR analysis of the target genes of miR-34 in HCT116 (A) or Panc-1 (B) cells.

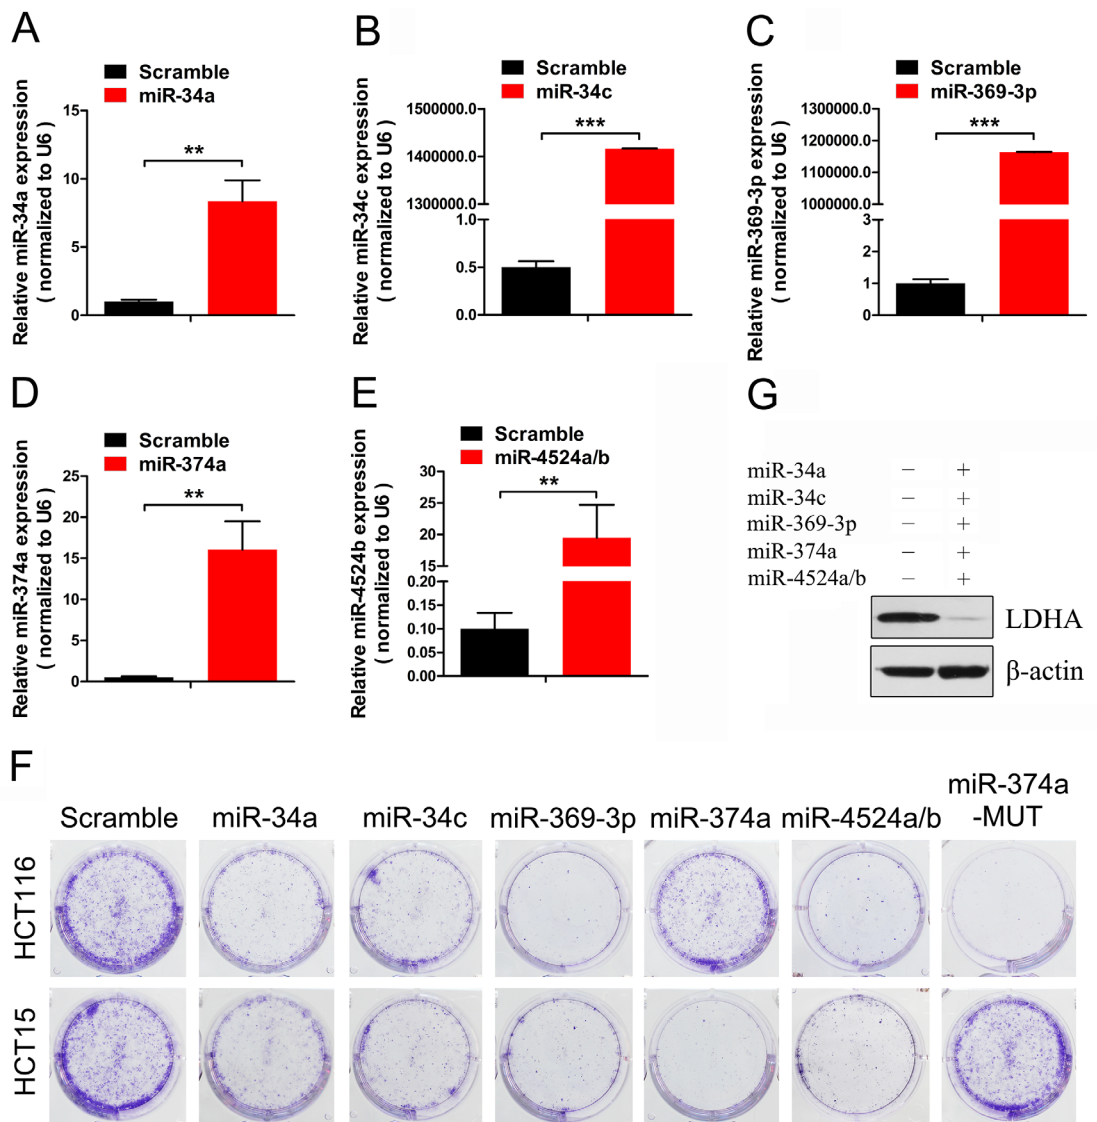

**Supplementary Figure 4:** (A–E) RT-PCR analysis of miR-34a (A), miR-34c (B), miR-369–3p (C), miR-374a (D), and miR-4524a/b (E) in cells stably expressing indicated miRNA. (F) Colony formation assay results. Five hundred HCT116 or HCT15 cells stably expressing indicated miRNAs or scramble cells were plated in 6-well plates supplemented with 10% FBS for 2 days followed with 2% FBS for a further 12 days. Colonies were stained with crystal violet. The number of colonies was counted from three independent experimental wells. (G) Western blot analysis of LDHA in HCT15 cells stably expressing indicated miRNAs.

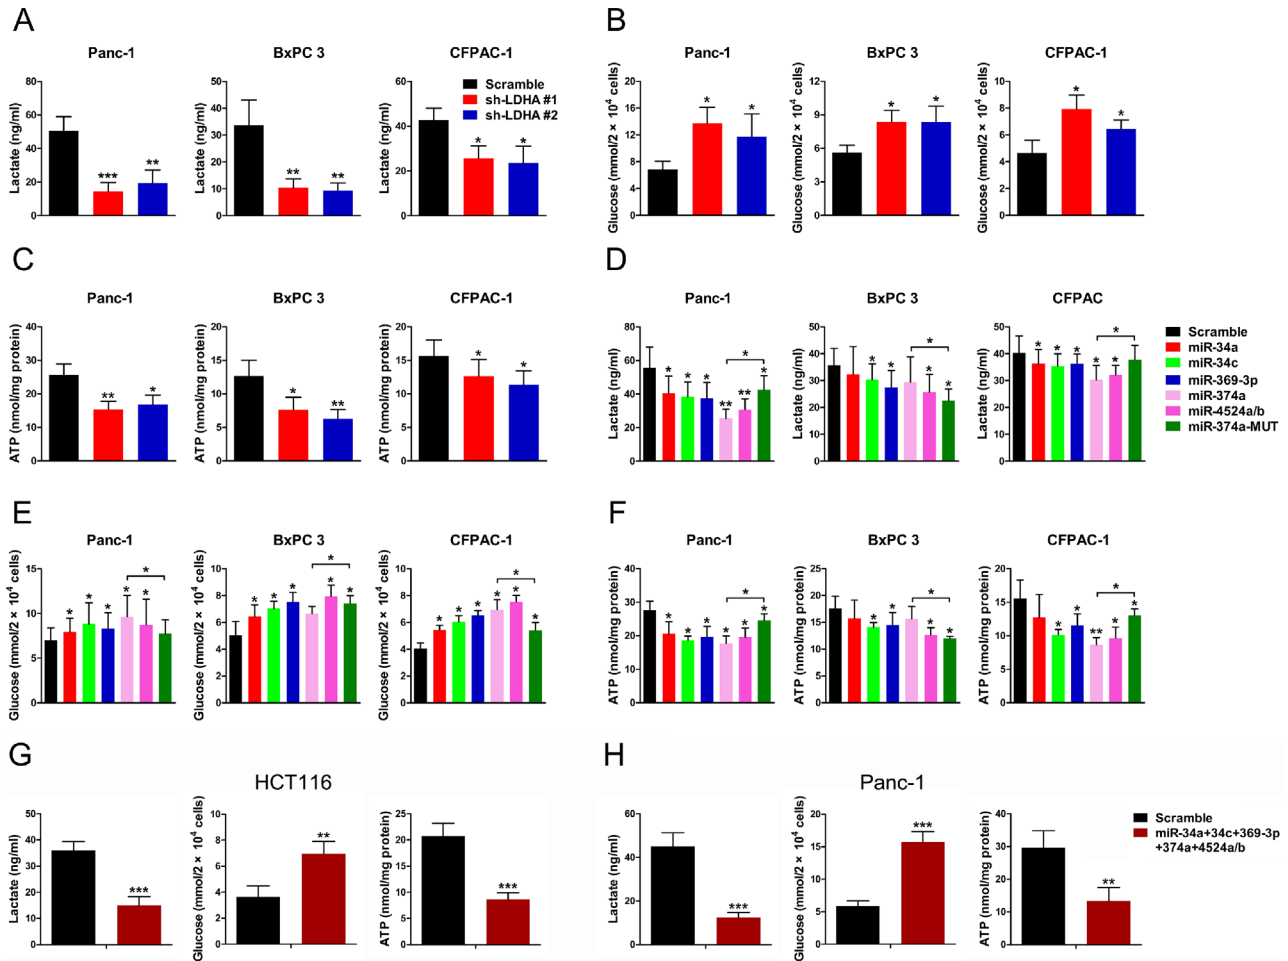

**Supplementary Figure 5:** (A, B, C) Lactate (in the culture media) (A), Glucose (in the culture media) (B), and intracellular ATP levels (C) in human pancreatic cancer cell lines stably expressing LDHA-shRNA and scramble-shRNA. (D, E, F) Lactate (in the culture media) (D), Glucose (in the culture media) (E), and intracellular ATP levels (F) in human pancreatic cancer cell lines stably expressing indicated miRNAs or scramble cells lines. (G, H) Analysis of Lactate (in the culture media), Glucose (in the culture media), and intracellular ATP levels in HCT116 (G) or Panc-1 (H) cells stably expressing miR-34a, miR-34c, miR-369-3p, miR-374a, and miR-4524a/b compared with scramble cells.

**Supplementary Table 1: The sequence in position 618–625 of LDHA 3' UTR**

| Cell lines | Sequence |
|------------|----------|
| HCT116     | TATTGAT  |
| HCT15      | TATTATA  |
| HT29       | TATTATA  |
| Panc-1     | TATTATA  |
| BxPC 3     | TATTGAT  |
| CFPAC-1    | TATTATA  |

UTR: untranslated region

**Supplementary Table 2: List of primer**

| Name of primer       | Sequences of primer                                                |
|----------------------|--------------------------------------------------------------------|
| RT-LDHA-F            | TTGACCTACGTGGCTTGAAG                                               |
| RT-LDHA-R            | GGTAACGGAATCGGGCTGAAT                                              |
| 3'-UTR-LDHA-F        | GCGTTTAAACCCTGTCTAGGCTACAACAGGAT                                   |
| 3'-UTR-LDHA-R        | CCCTCGAGTTGTTACCAGCTTCCAGAGGA                                      |
| Pri-miR-34a-F        | GCTCTAGATTCCGCACCCACGAGCAG                                         |
| Pri-miR-34a-R        | CGGAATTCCTTCTTATCAACAGGTGCTGG                                      |
| Pri-miR-34c-F        | GCTCTAGATCACTGTGTCTATTTGCCATCGTC                                   |
| Pri-miR-34c-R        | ATTTGCGGCCGCATAGGCAATGGATGAAAT                                     |
| Pri-miR-369-3p-F     | GCGAATTCTTCCACCAGGGAGGCCGTC                                        |
| Pri-miR-369-3p-R     | ATTTGCGGCCGCCAAGGTGAGATTTGATACT                                    |
| Pri-miR-374a-F       | GGTCTAGAAGCTGACAATCCAGAGCCTGT                                      |
| Pri-miR-374a-R       | CGGAATTCGGGTTAGGGAAAGCCTGAATAT                                     |
| Pri-miR-449a/c-F     | GCTCTAGAGCACCATATAAACTGTGCATTG                                     |
| Pri-miR-449a/c-R     | GCGAATTCGTTTTTGGACTAGATTC AAGCAAAT                                 |
| Pri-miR-4524a/b-F    | GCTCTAGAGCAACACAATGGCATTAGGAAGC                                    |
| Pri-miR-4524a/b-R    | ATTTGCGGCCGCTTTATAACAGGTCTGCTGCAC                                  |
| Flag-LDHA-F          | CCGGAATTCGCCACCATGGATTACAAGGATGACG<br>ACGATAAGGCAACTCTAAAGGATCAGCT |
| Flag-LDHA-R          | CGCGGATCCTTGTTACCAGCTTCCAGAGGAC                                    |
| miR-34a stem loop    | GTCGTATCCAGTGCAGGGTCCGAGGTATTTCGC<br>ACTGGATACGACACAACC            |
| RT- miR-34a-F        | GGTCCTGGCAGTGTCTTA                                                 |
| miR-34c stem loop    | GTCGTATCCAGTGCAGGGTCCGAGGTATTTCGC<br>ACTGGATACGACGCAATC            |
| RT- miR-34c-F        | GGTCCAGGCAGTGTAGTTAGCT                                             |
| miR-369-3p stem loop | GTCGTATCCAGTGCAGGGTCCGAGGTATTTCGCAC<br>TGGATACGACAAAGAT            |
| RT- miR-369-3p-F     | GGTCCAATAATACATGGTTG                                               |
| miR-374a stem loop   | GTCGTATCCAGTGCAGGGTCCGAGGTATTTCGCAC<br>TGGATACGACCACTTA            |
| RT- miR-374a-F       | GGTCCTTATAATACAACCTGA                                              |
| miR-4524a stem loop  | GTCGTATCCAGTGCAGGGTCCGAGGTATTTCGCAC<br>TGGATACGACTGAGAC            |
| RT- miR-4524a-F      | GGTCCATAGCAGCATGAACCT                                              |
| miR-4524b stem loop  | GTCGTATCCAGTGCAGGGTCCGAGGTATTTCG<br>CACTGGATACGACGAGACA            |
| RT- miR-4524b-F      | GGTCCATAGCAGCATAAGCC                                               |

(Continued)

| Name of primer | Sequences of primer     |
|----------------|-------------------------|
| RT-miRNA-R     | GTGCAGGGTCCGAGGT        |
| RT-Notch1-F    | TGGACCAGATTGGGGAGTTC    |
| RT-Notch1-R    | GCACACTCGTCTGTGTTGAC    |
| RT-CyclinD1-F  | CAATGACCCCGCACGATTTC    |
| RT-CyclinD1-R  | CATGGAGGGCGGATTGGAA     |
| RT-Snail-F     | ACTGCAACAAGGAATACCTCAG  |
| RT-Snail-R     | GCACTGGTACTTCTTGACATCTG |
| RT-Met-F       | GGTTCACTGCATATTCTCCCC   |
| RT-Met-R       | ACCATCTTTCGTTTCCTTTAGCC |
| RT-Bcl 2-F     | GGTGGGGTCATGTGTGTGG     |
| RT-Bcl 2-R     | CGGTTCAAGTACTCAGTCATCC  |
| RT-E2F3-F      | GTATGATACGTCTCTTGGTCTGC |
| RT-E2F3-R      | CAAATCCAATACCCCATCGGG   |
| RT-Sox2-F      | TACAGCATGTCCTACTCGCAG   |
| RT-Sox2-R      | GAGGAAGAGGTAACCACAGGG   |
| RT-PDGFR-A-F   | TTGAAGGCAGGCACATTTACA   |
| RT-PDGFR-A-R   | GCGACAAGGTATAATGGCAGAAT |
| RT-SIRT1-F     | AGCCAATTCTTTTGTGTTTCGTG |
| RT-SIRT1-R     | CGGCGTTTATCTTCGCTATCA   |
| RT-WNT1-F      | CGGCGTTTATCTTCGCTATCA   |
| RT-WNT1-R      | GCAGGATTCGATGGAACCTTCT  |
| RT-WNT3-F      | AGGGCACCTCCACCATTG      |
| RT-WNT3-R      | GACACTAACACGCCGAAGTCA   |
| RT-LEF1-F      | TGCCAAATATGAATAACGACCCA |
| RT-LEF1-R      | GAGAAAAGTGCTCGTCACTGT   |
| RT-AXIN2-F     | TACACTCCTTATTGGGCGATCA  |
| RT-AXIN2-R     | TTGGCTACTCGTAAAGTTTGGT  |
| RT-c-Kit-F     | ACTTGAGGTTTATTCCTGACCCC |
| RT-c-Kit-R     | GCAGACAGAGCCGATGGTAG    |
| RT-c-myc-F     | GTCAAGAGGCGAACACACAAC   |
| RT-c-myc-R     | TTGGACGGACAGGATGTATGC   |
| RT-Vinculin-F  | ATGGGTCAAGGGGCATCCT     |
| RT-Vinculin-R  | GGCCCAAGATTCTTTGTGTAAGT |
| RT-Bcl 6-F     | ACACATCTCGGCTCAATTTGC   |
| RT-Bcl 6-R     | AGTGTCCACAACATGCTCCAT   |
| RT-ULBP2-F     | GTGGTGGACATACTTACAGAGC  |

(Continued)

| Name of primer | Sequences of primer      |
|----------------|--------------------------|
| RT-ULBP2-R     | CTGCCCATCGAAACTGAACTG    |
| RT-DLL1-F      | TGTGACGAGTGTATCCGCTAT    |
| RT-DLL1-R      | GTGTGCAGTAGTTCAGGTCCT    |
| RT-CDK4-F      | CTGGTGTTTGAGCATGTAGACC   |
| RT-CDK4-R      | GATCCTTGATCGTTTCGGCTG    |
| RT- CyclinE2-F | TCAAGACGAAGTAGCCGTTTAC   |
| RT- CyclinE2-R | TGACATCCTGGGTAGTTTTTCCTC |
